# Supplementary material for: Thermal imaging ruled out as a supplementary assessment in patients with fibromyalgia: A cross-sectional study
Source: PLoS One. 2021 Jun 16;16(6):e0253281. doi: 10.1371/journal.pone.0253281 (PMC8208560; doi:10.1371/journal.pone.0253281)
Supplement: S1 Data — (XLSX) [file pone.0253281.s001.xlsx]

## Sheet: Hoja5
Participant	Group	Age	BMI	Neck_min	Neck_max	Neck_ave	Upper_back_min	Upper_back_max	Upper_back_ave	Lower_back_min	Lower_back_max	Lower_back_ave	Chest_min	Chest_max	Chest_ave	Knee_min	Knee_max	Knee_ave	Elbow_min	Elbow_max	Elbow_ave	Civil_status	Employment_status	Studies	Tobacco	Alcohol
FM001	1	61	21	32.35	34.6	33.7	32.15	34.85	33.45	29.7	34.6	32.4	30.2	34.75	32.75	30.15	31.95	31.1	30.5	32.5	31.4	1	2	2	4	4
FM002	1	49	21.4	30.25	34.3	33	30.8	33.1	31.65	29.75	32.55	31.05	28.2	34.4	32.05	30.2	31.65	30.95	31.1	33	32.05	1	1	3	1	2
FM003	1	66	31.7	30.6	35.05	33.55	30.4	34.2	32.5	30.45	34.35	32.6	31.6	34.9	32.55	30.75	32.85	31.9	28	32.2	30.85	1	3	3	4	2
FM004	1	70	30.5	32.3	34.9	33.9	31.15	34.75	32.8	32.25	34.7	33.15	32.15	34.9	33.1	29.65	32.3	31.65	29.1	34.3	33.05	1	3	3	3	1
FM005	1	46	30.4	30.05	34.8	33.65	30.4	34	32.05	29.1	33.95	31.35	30.8	35.3	32.35							1	2	2	3	2
FM006	1	56	30.4	29.85	34.4	33.3	29.85	33.8	31.9	28.65	34.05	31.3	30.3	33.6	31.85	27.85	31.15	29.7	28.95	31.5	30.15	1	3	2	4	3
FM007	1	54	25	31.5	35.3	34.6	30.85	33.9	32.5	31.4	35.1	33	31.15	34.25	32.75	31.1	32.75	31.8	29.95	33.2	31.95	1	2	2	1	3
FM008	1	49	26.6	30.85	34.8	32.95	31	34.1	32.45	30.6	34.9	32.1	31.05	33.95	32.55	29.7	31.5	30.8	30.4	33.35	31.75	1	1	4	2	2
FM009	1	59	23.8	33.25	35.8	35.2	32.55	35.45	34.1	32.4	35.7	33.95	32.35	35.3	33.6	31.5	33.85	32.65	32.4	35.05	33.95	1	2	3	2	1
FM010	1	53	26.3	31.85	34.8	34.15	30.8	34.35	32.55	31.4	34.1	32.75	30.25	33.55	32.15	29.95	31.25	30.5	28.9	32.35	30.3	1	1	4	1	2
FM011	1	47	31.9	30.95	33.8	32.25	30.65	33.5	32	30.85	33.15	32.05	31.35	35.9	32.95	30.85	33.05	32.05	30.95	32.9	32.05	1	2	2	1	2
FM012	1	48	23.2	32.2	35	34.2	30.9	34.25	32.85	29.6	33.6	31.3	31.2	34.65	33.1	29.1	32.15	31.15	30.9	33.25	31.85	1	1	2	1	3
FM013	1	53	24.4	27.45	30.3	29.35	26.65	29.9	28.2	30.35	32.9	31.5	30.9	34.7	32.25	29.5	31.15	30.4	28.7	32.5	31.45	1	1	2	4	4
FM014	1	62	27.4	33.15	35.25	34.4	31.55	34.4	33.1	31.35	35.2	32.9	32	35.15	33	30.45	31.9	31.1	31.8	33.7	32.75	4	2	2	1	5
FM015	1	57	22.9	31.9	34.85	33.85	31.25	34.35	32.9	27.9	34.1	30.8	30.55	33.7	32.15	27.7	30.3	29.25	30.25	33.35	32.05	1	2	2	4	5
FM016	1	51	23.4	33.55	35.85	34.9	33.5	35.45	34.45	31.65	35.05	33.5	33.55	35.8	34.55	32.25	33.7	33.05	32.75	35.3	33.65	1	3	4	3	5
FM017	1	51	26.8	31.95	33.8	33.15	29.8	33.1	31.6	29.9	33.55	31.15	30.45	33.8	31.65	28.5	30.2	29.45	29.85	32.5	31.15	1	3	3	1	2
FM018	1	49	26.1	31.55	34.45	32.95	30.45	33.35	32	29.45	33.35	30.9	30.5	33.75	32	29.95	31.3	30.65	29	32.4	31.2	1	1	4	3	4
FM019	1	51	38.9	31.65	34.55	33.1	30.6	33.35	31.95	30.65	33.45	32.1	30.85	33.55	32.2	29.7	33.7	31.75	30.75	32.5	31.65	1	1	2	1	2
FM020	1	53	25.1	31.5	35.65	34.45	30.65	33.55	32.15	28.55	34.35	30.6	30.35	34	32.15	30.1	32.35	31	30.05	33.15	32	1	2	3	3	3
FM021	1	47	21.8	33.55	35.8	34.9	32.5	35	34.05	30.25	34.7	32.5	31.9	34.55	33.15	30.35	31.75	31.1	31.35	32.65	31.9	4	1	4	4	2
FM022	1	64	32.5	31.5	34.4	33.4	30.35	33.55	32	31.5	34.95	33.25	30.85	34.1	32.1	31.55	34.3	32.7	29.7	32.85	31.05	1	1	3	3	5
FM023	1	62	31.2	31.5	34.4	33.05	31.35	33.95	32.5	31.6	35.5	33.3	30.05	33.95	31.75	27.75	32.1	31.45	31.4	33.1	32.1	3	2	2	3	3
FM024	1	45	25.3	33.15	34.9	34.35	30.1	33.95	32.3	29.2	33.35	30.9	31.2	34.1	32.65	29.6	31.85	30.8	30.45	33.2	31.95	1	3	3	3	5
FM025	1	56	28.6	32.35	34.35	33.6	31.1	33.85	32.45	30.3	34.75	32.4	31.4	34.3	32.5	28.7	31.55	30.3	30.15	32.5	31.1	1	1	2	3	2
FM026	1	62	24.6	32.7	35.7	35.05	30.55	34.75	32.25	29.35	34.4	31.65	30.5	33.45	31.8	30.35	32.05	31.1	30.3	32.05	30.15	1	1	2	4	5
FM027	1	59	19.9	32.3	35.25	34.05	31.6	34.2	32.8	29.95	33.8	31.8	30.55	34.4	32.55	31.05	32.65	31.7	30.9	32.7	31.7	1	3	3	4	5
FM028	1	61	24.7	32.4	34.05	33.5	30.8	33.7	32.35	29.95	34.4	31.85	31.3	34.45	32.6	30	31.8	30.75	31.3	32.8	32.05	2	1	4	3	4
FM029	1	60	29.8	30.75	33.15	32.2	28.65	31.65	30.1	27.8	30.55	29.35	28.3	32.55	30.2	28.25	29.9	29.35	28.65	30.6	29.85	1	1	3	4	2
FM030	1	51	30.9	32.55	35.45	34.55	32.25	35.1	33.8	32	35.85	34.2	32.45	36.05	33.95	31.55	33.05	32.2	30.65	32.9	31.5	1	1	4	1	4
FM031	1	48	25.8	30.55	32.7	31.7	30.35	33.65	31.95	30.25	32.95	31.45	29.85	34.35	31.55	30.25	31.95	31	30.6	32.9	31.8	1	4	2	1	4
FM032	1	52	23.1	31.3	34.9	34.1	30.75	33.3	32.05	30.2	34.15	32.3	30.95	34.25	32.5	29.8	31.5	30.55	30.3	32.65	31.15	4	2	3	4	2
FM033	1	57	28.5	32.2	34.75	33.95	32.6	34.15	32.6	30.55	35.25	33.15	32.3	34.1	33.2	31.65	32.95	32.3	31.35	32.9	32	1	2	3	4	5
FM034	1	55	28.1	32.05	34.7	33.8	30.75	33.8	32.75	29.75	33.7	31.65	31.25	34.05	32.65	29.15	31.25	30.4	30.45	32.85	31.9	4	2	3	4	5
FM035	1	66	27.4	32.85	35.1	34.2	31.35	34.3	32.45	31.45	34.6	32.8	31.45	35	33.55	31.95	33.55	32.65	31.65	34.2	32.9	1	1	3	2	3
FM036	1	45	30.2	30.9	34.65	32.85	30.4	32.7	31.55	29.35	33.75	31.35	31.1	33.3	32.1	30.7	32.3	31.45	31	32.65	31.8	1	3	3	3	1
FM037	1	58	25.4	31.35	35.3	34.3	31.35	34.1	32.85	30	33.5	31.2	31.6	34.45	33.05	30.4	32.45	31.65	31.9	33.7	33	2	1	3	4	3
FM038	1	55	31.2	29.85	33.4	32.55	29.5	31.7	30.5	28.95	33.05	30.65	29.75	33.5	31.1	28.2	30.75	29.55	29.7	32.65	30.85	1	1	2	3	4
FM039	1	55	23.7	32.8	35.8	35.2	31.7	34.6	33.15	31.2	35.45	32.75	32.05	35.05	33.25	30	32.2	31.25	30.75	33.7	32.4	1	1	2	4	2
FM040	1	67	33.5	33.1	35.55	34.75	31.3	34.15	32.75	31.5	35.55	33.75	31.15	35.25	33.1	30.95	34.4	33.15	31.3	33.75	32.15	1	1	3	1	4
FM041	1	50	32.1	31.85	34.8	33.65	30.85	33.3	32.2	31.15	34.6	32.75	31.6	33.7	32.5	30.6	31.75	31.2	30.55	32.2	31.15	1	3	2	4	3
FM042	1	51	21.7	33	34.8	34.35	33	35	33.95	32.2	35.55	34	31.9	35.3	34.35	32.2	34.5	33.3	30.85	33.5	32.5	1	1	2	1	5
FM043	1	56	34.1	32.2	34.15	33.6	32.3	34.55	33.25	31.35	35	33.1	31.7	34.25	32.9	30.1	32.05	31	31.4	33.9	32.45	1	1	2	4	5
FM044	1	49	31.6	30.5	33.45	32.6	28.8	32.35	30.85	28.9	33.35	30.9	29.65	33.8	31.25	29.2	32.65	30.9	30.45	32.3	31.1	1	2	3	3	2
FM045	1	50	33.9	30.45	33.55	32.6	29.9	32.85	31.1	28.6	32.65	30.5	30.3	33.15	31.75	29.2	31.55	30.1	29.6	31.7	30.45	4	1	3	4	4
FM046	1	47	39.9	30.4	33.75	32.3	29.45	32.75	31.1	27.35	34.8	31.3	29.6	33.7	31.35	29.7	31.45	30.5	29.65	33	30.95	1	1	2	3	4
FM047	1	51	24.1	31.55	35.3	34.35	31.9	34.4	33.1	31	34.65	32.9	32	34.25	33.05	30.95	32.4	31.8	30.4	31.95	31.3	1	2	4	3	3
FM048	1	58	35.1	31.15	33.75	32.95	29.85	32.95	31.25	32.45	34.55	32.4	32.4	34.65	33.4	29.2	31.55	30.55	30.6	32.8	31.45	2	1	4	3	2
FM049	1	58	26.8	32.65	35.15	34.5	31.4	34.55	32.85	30.95	34.6	32.5	31.8	35.85	33.25	29.9	31.6	30.55	30.5	32.7	31.45	4	2	2	1	2
FM050	1	43	21.2	31.65	34.35	33.3	30.95	34.15	32.7	29.4	33.5	31.7	31.95	34.9	33.2	29.85	31.25	30.65	29.15	31.6	30.85	1	1	2	4	3
FM051	1	52	33.6	31.05	33.55	32	30.3	33.75	31.65	29.55	35	31.45	30.85	34.3	32.3	30	31.75	30.75	30.7	32.85	31.45	1	1	3	4	5
FM052	1	38	32.2	31.1	33.55	32.5	30.85	32.95	32	30.15	34.3	31.95	31.7	34.3	32.7	30.1	32	31	31.1	33.15	31.95	1	1	3	4	5
FM053	1	44	24.9	32.8	35.55	34.8	32.8	35.2	34.15	32.2	35.85	33.9	33.7	35.9	34.65	31.65	32.75	32.25	32.2	34.6	33.3	1	4	2	4	5
FM054	1	52	20.6	34.05	36.1	35.5	32.3	35.6	33.95	30.6	35.3	33.3	32.55	35.25	34.05	29.65	31.55	30.8	31.8	33.45	32.6	1	1	3	3	3
FM055	1	51	21.7	33.8	35.45	34.85	32.2	34.8	34	31.8	34.85	33	33.9	35.95	34.9	31.05	33.65	32.55	31.05	33.45	32.35	2	3	3	1	4
FM056	1	58	22.4	31.5	35.25	33.35	32	34.9	33.8	30.95	34.15	32.65	31.9	34.8	33.3	29.85	32.65	31.75	31.25	34	32.65	1	1	3	3	2
FM057	1	46	22.2	32.95	34.95	34.1	31.75	34.4	33.2	31	34.05	32.1	31.15	33.9	32.2	30.95	32.3	31.65	30.9	33.6	32.2	1	1	2	3	2
FM058	1	44	23.8	32.9	35.05	34.55	32	34.65	33.2	30.9	34.4	32.8	32.45	34.4	33.35	30.35	31.85	31.05	31.05	32.85	31.8	1	1	3	4	5
FM059	1	68	36.2	27.5	34.25	33.55	30.9	34.1	32.65	30.45	33	33.3	31.55	34.9	32.8	30.05	32.5	30.9	30.25	33.25	31.35	1	3	3	3	3
FM060	1	51	33.3	31.05	34.45	33.45	28.3	33.6	30.35	26.6	31.35	28.3	28.4	32.9	30.2	28.15	30	28.9	30.35	32.9	31.5	2	1	3	4	5
FM061	1	64	33.2	31.25	35.2	33.3	29.9	33.55	31.7	27.9	35.15	30.75	31	35.55	32.7	27.8	29.75	28.6	28.1	31.55	29.45	1	3	2	4	5
FM062	1	53	33.6	32.4	34.75	34.1	30.55	34	32.05	30	34.7	32.7	30.95	33.85	32	29.2	31.9	30.5	30.25	32.95	31.5	1	1	3	3	2
FM063	1	51	32.7	31.6	34.45	33.45	29.3	32.6	31.2	29.25	34.9	31.15	30.1	34.25	31.75	30.05	32.4	31.4	29.3	31.7	30.15	1	4	2	3	2
FM064	1	59	21.8	32.7	35.1	34.45	30.8	34.4	32.5	29.7	34.3	31.55	31.05	34.5	32.65	29.5	31.45	30.15	31.15	33.85	32.6	1	2	3	1	4
FM065	1	60	26.1	31.9	34.45	33.7	29.5	33.7	31.5	28.75	32.75	30.25	31.2	33.8	32.25	29.95	31.2	30.5	30.45	32.6	31.35	1	3	2	4	2
FM066	1	54	29.4	32.6	35.2	34.3	29.7	34	31.5	28.95	33.15	30.95	30.6	33.85	31.95	29.15	30.7	29.75	30.2	33.15	31.5	1	1	2	3	4
FM067	1	61	34.8	30.25	33.3	32.25	29.55	32.1	30.75	29	33.6	30.75	29.8	34.1	31.25	29.45	31.95	30.7	28.2	32	30.15	1	3	3	3	3
FM068	1	67	34.2	29.75	33.55	32.05	27.35	30.6	28.95	27.9	31.4	29.3	29.45	35.35	30.8	29.15	30.95	30.1	29.65	32.3	31.05	4	3	2	4	5
FM069	1	67	31.6	31.4	34.9	33.6	29.5	32.95	31.35	28.35	34.15	31.35	30.45	34.35	31.3	29.4	32.55	30.05	30.5	32.4	31.35	1	1	3	3	3
FM070	1	69	25.7	31.6	34.6	33.55	30	33.2	31.75	27.1	33	29.9	28.4	33.15	30.45	29	30.65	29.95	27.25	31.2	30.05	1	3	3	1	2
FM071	1	57	28.7	29.35	32.1	31.15	29.4	32.7	31	27.75	31.55	29.4	29	33.1	30.45	28.95	30.7	30.05	28.6	31.85	30.7	1	3	3	4	3
FM072	1	52	21.2	32.5	35.85	34.35	30.5	33.65	32	28.8	33.15	30.55	30.55	34.05	32.05	29.5	32.15	31.25	30.85	33.2	31.95	2	3	3	4	2
FM073	1	67	30.4	28.75	34.2	33.2	29.05	32.75	31.1	27.65	32.45	29.55	29.4	33.5	31.55	28.45	31.05	29.9	30.2	32.75	31.55	1	1	2	1	4
FM074	1	64	30.1	31.05	33.5	32.65	29.2	33.8	31.35	29.2	33.7	31.35	29.4	33.8	31.1	29.05	31.7	30.1	30.55	33.55	31.8	1	3	4	4	1
FM075	1	51	29.7	29.3	32.45	31.25	29.65	32.95	31.25	28.3	32.9	30.15	30.45	34.15	32	28.6	31.15	29.8	30.9	33	31.9	4	1	1	4	5
FM076	1	57	28.8	29.95	34.1	33.25	29.5	33.4	31.5	27.45	34.15	30.1	29.7	33	31.2	28.4	30.6	29.45	29.4	32.85	31.2	4	3	2	4	1
FM077	1	63	26.4	31.85	35.15	34.4	29.6	34.45	32.05	27.6	33.4	30.8	30.15	33.65	31.7	27.35	29.9	28.7	29.3	32.1	30.75	1	1	2	3	4
FM078	1	51	19.5	32.45	34.7	34.1	30.4	33.85	32.5	28.7	33.2	30.7	30.35	34.15	32.6	28.9	31	30.15	30.55	32.55	31.4	4	2	2	4	2
FM079	1	53	23	33.55	35	34.45	30.8	34.25	32.5	28.9	33.8	31.55	31.2	34.7	33	28.6	31.25	29.6	29.75	32.4	31.2	1	3	4	3	5
FM080	1	50	23.5	32.05	35.05	34.3	29.45	34.3	32.15	28.1	33.8	30.45	28.95	33.75	31.45	28.5	31.45	29.9	29.1	31.2	30.3	1	1	3	3	5
FM081	1	52	31.5	30.95	34.4	33.15	29.35	33.15	31.3	27.45	34.3	30.8	29.5	33.65	31.4	28.4	30.35	29.75	29.65	32.35	30.95	4	2	2	3	5
FM082	1	49	24.9	30.8	34.15	33.4	30.15	33.85	31.9	28.7	33.7	30.7	29.8	34.6	31.8	29.2	31.3	30.25	29.75	32.45	31.45	1	1	2	1	5
FM083	1	50	36.6	31.6	33.85	32.75	30.4	33.4	31.65	29.85	34.25	31.75	29.9	32.75	31.2	27.8	31.5	29.25	28.5	30.65	29.15	1	1	2	1	2
FM084	1	62	30.6	30.05	33	31.9	27.6	31.95	30	27.1	31.2	29	27.3	33.4	30.05	29.25	30.9	29.9	29.85	31.6	30.6	1	1	2	3	1
FM085	1	65	24.1	31.55	34.7	33.55	29.6	33.55	31.85	28.45	34.4	31.15	30.8	34.2	32.1	29.1	32.35	30.25	29.6	32.2	30.6	1	1	4	3	4
FM086	1	48	26.8	32.6	34.8	34.1	28.4	34.75	32.5	28.85	34.1	31	30.75	33.65	32.15	27.95	31.8	29.5	30.3	32.45	31.4	1	1	3	4	5
CG001	2	54	22.6	32.2	34.6	33.95	30.25	33.65	32.1	29.6	33.85	31.4	30.8	33.8	32.25	29.5	31.15	30.15	30.25	32.15	30.95	4	1	2	4	4
CG002	2	54	19.7	32.65	34.8	34.05	32.35	34.45	33.65	31	34.45	32.75	32.8	35	33.85	29.9	31.8	30.8	30.15	33.1	32.35	1	2	2	4	4
CG003	2	53	23.5	32.45	34.1	33.55	32.15	35.1	33.65	31.65	35.35	33.25	31.85	34.15	33	29	31.25	29.7	30.1	32.6	31.55	2	1	3	2	1
CG004	2	52	24.7	31.75	34.9	34.25	32.05	34.75	33.5	31.2	34.25	32.75	31.65	34.15	33.2	30.4	32.55	31.4	31	33.1	32	1	1	4	2	2
CG005	2	53	28	30.5	32.55	31.4	29.45	33.15	31.3	28.1	32.25	29.9	29.1	32.7	30.5	27.45	29.8	28.35	30.5	32.85	31.5	1	1	4	4	4
CG006	2	55	27.4	33.6	36.25	35.2	32.3	34.85	33.75	31.7	35.5	33.85	31.7	34.45	32.8	30.3	33.05	31.75	31.05	33.15	32.05	1	1	4	3	3
CG007	2	54	21.7	31.95	34.1	33.05	31.05	33.6	32.3	27.9	33.2	31.3	30.95	33.75	32.1	29.8	31.9	30.75	30.1	32.4	31.55	2	1	4	3	3
CG008	2	52	26.7	31.9	33.8	33.25	30.15	34.15	32.55	31.65	34.75	33	30.85	33.2	32.25	30.45	32.25	31.4	31	32.9	31.8	1	1	4	4	4
CG009	2	57	27.8	33.05	34.6	34	31.3	33.9	32.45	29.15	34.5	31.8	31.35	34.25	32.5	29.2	30.7	29.9	30.05	32.3	31.3	1	2	3	3	3
CG010	2	53	33.3	31.5	33.9	33.1	30.1	33.9	31.6	29.35	33.45	31.35	30.65	34.2	32	29.25	31.15	30.05	29.85	32.9	31.2	4	1	3	1	4
CG011	2	62	22.3	31.1	34.6	33.6	32.3	35.15	33.75	31.35	34.95	32.85	32.65	35.4	34	29.5	31.05	30.05	30.65	32.6	31.55	1	2	2	1	1
CG012	2	62	25.5	33	35.05	34.4	31.65	35.4	33.3	30.8	34.8	32.55	31.85	35.55	33.35	28.65	30.9	29.8	30.45	33.45	31.9	1	2	2	3	3
CG013	2	48	22.1	32.85	35.7	35.2	31.3	35.65	33.85	31.85	34.5	33.1	32.45	35.25	34.05	30.85	32.95	31.95	31.75	34.05	33.15	1	1	3	4	2
CG014	2	56	22.5	32.6	34.15	33.5	31.35	34.2	33.1	31.35	34.55	32.65	30.9	34.4	32.6	30.65	32.55	31.6	30.8	33.4	32.1	1	1	2	4	2
CG015	2	51	27.3	30.85	33.25	31.95	29.7	32.55	30.95	29.3	31.45	30.45	30	32.75	31.25	29.5	31.7	30.65	30.15	32.45	31.05	1	1	3	4	2
CG016	2	54	33.7	31.3	34.35	32.8	30.05	32.8	31.2	29.6	32.5	31.05	30.3	33.35	31.65	28	31	30.25	30.2	32.15	30.85	1	2	2	1	3
CG017	2	49	21.7	33.25	35.35	34.75	31.7	34.55	32.95	30.55	33.9	32.1	32.5	35.4	33.85	30.7	32.25	31.03	31.1	33.25	32.25	4	1	3	4	2
CG018	2	57	23.1	31.6	36.1	34.6	29.5	33.9	31.7	30.5	33.15	30.1	29.6	32.75	31.05	29.9	31.85	30.95	29.95	32.5	31.1	1	1	4	4	5
CG019	2	60	27.8	31.7	34.25	33.2	30.65	33.75	32.35	30.5	34.6	32.25	30.65	34.3	32.25	29.25	30.9	29.95	29.85	32.1	30.95	1	1	4	4	4
CG020	2	67	24.7	32	35.05	34.45	29.45	33.8	31.95	29.25	34.25	31.2	29.5	33.2	31.1	29.8	32.1	30.45	30.25	33.6	32.15	4	1	3	1	2
CG021	2	49	31.49	31.55	34.55	33.2	28.5	32	29.95	27.95	31.45	29.2	30.2	33.3	30.75	28.5	30.95	29.7	29	33.05	31.5	1	1	3	3	2
CG022	2	64	25	33.2	29.95	34.15	31.15	33.75	32.35	30.8	33.75	32.35	31.35	35	33.35	29.35	32.9	31.05	31	33	31.85	2	2	2	1	5
CG023	2	64	23.3	31.2	33.6	32.5	29.9	32.5	31.3	26.65	32.45	28.9	28.1	33.35	30.85	27.35	30.15	28.2	30.15	33.4	31.6	2	2	3	4	2
CG024	2	54	24.2	31.35	34.65	33.15	29.2	32.15	30.7	28.4	33	30.2	30.15	33.45	31.45	29.35	31.8	30.35	28	31.7	30.3	4	2	3	3	2
CG025	2	55	26.1	30.1	32.75	31.75	28.5	31.3	29.9	26.6	33.1	29.3	27.75	32.85	29.55	29	30.55	29.65	29.65	32	30.65	1	3	3	4	1
CG026	2	53	23.2	31.9	35.1	34.4	30.9	33.65	32.45	28.45	34.25	30.95	30.55	33.65	32	30.75	33.05	31.85	30.55	34	32.85	1	2	2	4	3
CG027	2	49	25.6	31.3	33.3	32.55	28.7	32.6	30.75	27.1	31.45	28.8	29.1	33.6	31.1	27.4	30.65	28.7	26.05	31.7	29.8	1	1	2	4	5
CG028	2	49	23.5	32.85	35.15	34.25	31.65	34.25	33.15	30.15	34.1	31.75	31.35	35.15	33	30.1	32.45	30.7	30.7	32.75	31.85	1	1	4	3	4
CG029	2	48	23	31.1	34.05	33	30.15	33.15	32.1	28.05	32.6	30.2	30.1	33.55	31.65	28.85	30.7	29.4	29.4	32.15	31.1	1	1	4	4	5
CG030	2	57	29.3	32.5	34.8	33.9	29.95	33.6	31.85	28.65	34.35	30.9	30.2	33.45	31.65	28.4	30.4	29.2	29.1	32.7	30.95	1	1	2	3	3
CG031	2	48	23.4	33.15	35.3	34.3	32.15	34.95	33.6	30.65	35.2	32.65	32.45	35.6	33.7	30.85	32.6	31.7	30.75	33.05	32.2	1	1	4	4	2
CG032	2	52	28.8	31.05	34.15	33.05	30.05	33.15	31.5	29.05	33.2	30.95	29.95	34.6	32	29.7	31.35	30.4	30.2	33.3	31.5	1	1	2	3	3
CG033	2	51	23.9	32.75	35	33.9	31.65	34.5	33.05	29.55	32.95	31.35	31.75	34.55	33.1	30.6	32.75	31.4	31.15	33.75	32.7	1	1	2	3	2
CG034	2	54	21.1	32	34.2	33.7	30.3	34	32.35	27.6	33.65	30.5	30.05	33.75	31.9	27.85	30.4	28.8	27.9	32.65	31.6	1	1	2	4	4
CG035	2	49	25.1	31.9	33.4	32.85	29.35	32.6	30.85	27.55	31.45	29.35	29.2	32.9	31.6	28.95	30.8	29.85	29.75	31.9	30.95	2	1	2	4	2
CG036	2	52	21.8	32.35	33.75	33.3	29.45	33.85	32.05	27	35	30.6	29.3	33.6	31.2	27.4	29.7	28.35	29.05	32.15	30.9	1	1	3	4	5
CG037	2	51	23.9	30.95	34.4	33.05	30.1	33	31.75	28.95	33.2	31.05	29.25	32.85	31.15	30.45	31.9	31.15	30.15	32.7	31.1	1	1	3	1	3
CG038	2	53	29.4	32.1	35.2	34.3	31.2	33.75	32.55	29.45	34.9	32.3	31.9	35.35	33	30.4	31.95	31.05	31.25	33.5	32.4	1	1	3	3	4
CG039	2	62	27.2	31.9	34.45	33.5	29.3	33.3	31.85	28.3	33.7	31.1	31.4	34.05	32.65	30.85	34.65	32.05	30.65	33.4	31.95	1	3	1	4	5
CG040	2	64	23.4	32.2	34.75	33.85	30.35	33.75	32	29.2	33.2	30.4	31.55	34.9	33.05	28.9	30.5	29.75	30.55	33	31.55	1	1	2	4	5
CG041	2	64	26.5	31.9	35.15	33.95	30.7	33.9	32.45	30.7	34.4	32.8	32.15	34.95	33.55	30.5	31.9	31.1	30.9	33.45	32.35	1	3	1	3	2
CG042	2	61	19.7	33.25	36	35.45	32.6	33.7	34.05	31.7	34.55	32.8	33.35	35.15	34.25	30.45	33.1	31.45	29.65	32.95	31.5	1	2	2	3	4
CG043	2	59	27.9	30.55	33.65	32.75	28.55	32.5	30.35	27.85	35.05	29.5	29.1	32.7	30.9	29	30.7	29.65	29.5	32	30.65	1	4	2	4	4
CG044	2	65	27.3	31.3	34.8	33.35	27.45	32.45	30.75	27.85	33.75	30.05	29.75	32.95	31.2	28	30.35	28.75	29.4	31.8	30.55	3	1	3	1	2
CG045	2	51	25.5	30.95	33.85	32.7	28.65	32.45	30.95	27.5	30.85	28.8	29.5	32.6	30.9	29.35	31	30.2	29.05	31.4	30.4	3	2	3	3	3
CG046	2	59	36.9	29.7	33.05	31.55	28.2	30.85	29.3	28.75	31.3	30	29.25	32.65	30.75	28.5	29.7	29	28.8	30.7	29.75	1	3	2	3	2
CG047	2	53	24	34.2	35.85	35.35	32.25	34.85	33.75	31.7	34.25	32.95	31.2	35.4	34.1	30.9	32.5	31.6	31.2	33.4	32.45	2	1	4	4	2
CG048	2	63	32.4	32	35.25	34.35	31.2	33.9	32.55	29.75	34.8	32.35	31.9	35.2	33.05	30.35	32	31.05	31.15	33.6	32.5	1	2	3	2	3
CG049	2	66	31.1	32.6	35.45	34.45	30.45	34.7	32.9	30.35	35.15	32.75	30.95	34.5	32.65	31	32.2	31.35	30.25	32.65	31.3	1	1	3	3	2
CG050	2	69	29.1	32.55	34.7	33.9	32.2	34.35	33.3	30.85	35.35	33.25	32.35	35	33.55	30.6	32.6	31.7	30.15	33.3	31.45	1	3	2	3	5
CG051	2	57	33.3	33.65	36.25	35.4	32.8	35.2	34.15	31.85	35.8	33.55	32.4	35.2	34	31.35	33.25	32.25	30.7	32.95	31.6	1	3	2	4	5
CG052	2	66	32.4	31.5	35	34.3	30	33.8	31.85	29.1	33.6	31	28.65	34.25	31.15	28.85	31.5	30	28.8	32.5	29.9	4	3	2	4	2
CG053	2	67	28.1	31.15	34	33	31.7	34.6	33.35	28.65	32.35	30.45	29.4	33.85	31.65	29.7	31.75	30.5	29.55	32.1	30.4	1	4	2	2	2
CG054	2	55	28.7	32.15	34.95	33.95	30	33.9	31.6	28.35	33.15	30.15	30.25	33.75	31.75	30	31.85	30.85	29	31.2	29.7	1	3	2	4	2
CG055	2	52	23.3	33.05	34.8	34.3	30.9	34.15	32.5	29.2	34.1	31.8	30.65	34.2	32.35	29.9	32.15	31.1	29.8	32.05	30.8	3	3	2	4	4
CG056	2	48	31	32.15	34.55	33.45	30.3	33.4	31.95	30.7	34.5	32.1	30.75	34.55	32.2	29.8	31.75	30.7	30.4	32.25	31.2	1	2	3	1	5
CG057	2	45	24.1	33.15	35.35	34.55	32.1	34.8	33.5	30.55	34.95	32.65	32	35.35	33.7	30.35	32.75	31.3	30.15	32.65	31.4	1	1	4	4	2
CG058	2	66	27.2	31.1	33.85	33.1	29.5	33.05	31.5	29.25	33.8	32.2	30.4	33.05	31.6	29.75	31.95	30.75	30.4	32.7	31.35	2	1	4	4	5
CG059	2	59	23.1	32	34.8	34.1	30.75	33.75	32.6	30.15	33.6	31.6	30.65	33.65	32.05	29.3	31.4	30.15	29.75	32.35	31.25	2	1	4	4	2
CG060	2	52	26.6	31.8	34.5	33.55	29.9	32.75	31.4	27.85	33.35	29.95	30	33.45	31.45	29.35	30.95	30.05	29.95	32.35	31.05	1	3	4	3	3
CG061	2	61	29.5	32	34.4	33.65	30.15	33.65	31.95	29.25	34.45	31.65	30.8	33.5	31.95	28.9	32.45	30.55	30.7	33	31.65	1	1	4	3	3
CG062	2	53	28.6	31.9	35.1	34.05	30.4	33.3	31.7	29.1	32.95	30.8	30.6	34.95	32.2	28.8	31.25	29.6	30.45	32.85	31.55	1	1	3	4	2
CG063	2	61	33.4	32.25	34.55	33.6	29.25	32.55	31.15	28.4	33.95	30.65	29.25	33	30.85	29.3	32.75	30.85	29.7	32.7	30.6	3	1	4	1	4
CG064	2	60	23	32.65	34.65	33.8	31.4	33.95	32.7	28.65	34.8	31.8	30.55	34.5	32.85	29	30.9	30.15	30.65	32.85	31.65	1	3	4	1	2
CG065	2	45	19.9	34.15	35.55	34.75	33.15	35	34.1	30.25	34.45	32.8	32.3	35.1	33.95	30.55	32.6	31.3	30.7	32.5	31.7	1	4	3	3	2
CG066	2	56	35.6	31.45	34.5	33.35	29.4	32.75	31.1	30.3	35.1	32.3	31.05	34.15	32.4	27.8	30.15	29.2	29.9	32.95	30.8	4	3	4	4	5
CG067	2	69	33.9	30.55	35.25	33.35	28.95	33.75	30.85	29.05	33.35	30.7	30.75	35	31.95	28.1	30.15	29.05	27.95	30.8	29.8	1	1	4	3	1
CG068	2	46	23.3	31.5	35.3	34.1	31.1	34.05	32.6	28.55	33.65	31.4	31.1	35.35	32.6	28.05	30.8	29.2	28.95	30.85	29.8	1	2	2	1	1
CG069	2	52	23.8	32.1	34.5	33.8	30.85	34.25	32.4	30.5	33.25	32.1	30.75	33.15	32.1	28.85	32.15	30.6	30.35	33.25	31.35	4	3	3	4	5
CG070	2	46	26.9	32.25	34.2	33.5	30	33.3	31.8	28.2	32.9	30.6	30.45	34.7	32.1	27.95	31.15	29.05	29.4	31.8	30.75	2	1	4	4	2
CG071	2	46	19.9	31.55	34.8	34.1	31.1	34.3	32.75	29.45	34.15	31.4	30.5	34.95	32.65	27.55	30.6	29.1	29.8	31.8	30.85	2	1	4	4	3
CG072	2	60	29.2	30.35	32.35	31.5	28.15	32	30.3	28.25	32.7	30.65	29.15	32.3	30.95	28.35	31.6	30.3	29.65	32.55	31.1	1	1	4	3	2
CG073	2	52	26.4	30.95	33.5	32.65	27.8	32.2	30.55	26.8	32.25	28.8	28.5	33.15	30.6	29.35	31.65	30.05	28.9	31.45	29.75	1	1	4	2	3
CG074	2	54	29.1	29.75	33.65	32.1	28.9	32.05	30.15	28.25	31.8	29.45	29.5	32.55	30.65	28.15	31.15	29.15	28.1	31.1	29.95	1	1	4	1	2
CG075	2	51	24.2	31.4	33.95	33	29.65	32.65	31.1	27.5	31.95	29.2	29.7	32.95	31.2	28.2	30.8	29.65	29.75	32.55	31.4	1	1	2	1	5
CG076	2	50	31.2	30.75	34.45	32.9	29.45	32.5	31	28.45	33.5	30.8	30.1	33.5	31.3	28.2	29.95	28.75	29.3	31.6	30.15	4	1	3	2	4
CG077	2	66	27.7	26.75	30.7	28.8	26.25	29.5	27.95	26.05	31.05	28	27.95	32.55	29.5	28.45	30.25	29	28.65	31.55	29.95	1	1	4	4	3
CG078	2	52	29.6	33.1	34.95	34.1	30.55	33.5	32.05	30.2	34.2	31.8	31.2	34.5	32.85	29.85	32.15	31.15	29.95	33.1	31.1	1	1	2	2	5
CG079	2	50	25.5	31.75	34.25	33.35	30.4	33.5	31.85	28.45	34.3	30.9	31.1	34.3	32.4	28.45	31.1	29.45	30.2	32.75	31.65	1	3	2	4	3
CG080	2	51	23.2	31.7	34.8	33.8	30.1	34	32.15	28.25	33.45	30.15	30.65	34.8	32.4	27.35	31.65	29.4	29.45	31.7	30.8	1	1	4	3	5
CG081	2	53	30.9	32	34.75	33.25	29.4	33.5	31.8	29.45	32.95	31	30.7	34	29.5	28.65	30.95	29.55	30.25	32.8	31.6	4	1	3	1	3
CG082	2	48	27	32.75	35.3	34.2	30.05	34.4	32.65	29.1	32.85	30.75	28.65	34.2	31.3	28.2	30.8	29.35	30.95	33.5	32.05	1	1	4	3	2
CG083	2	45	20.4	32.5	34.9	34.2	30.2	34.65	33.25	29.4	33.9	31.5	31.55	35.15	33.75	28.75	31.2	29.65	30.4	32.2	31.3	2	1	4	4	5
CG084	2	46	20.8	33	34.8	34.2	33.1	35.35	34.35	25.9	34.4	32.2	32.8	35.15	33.9	29.7	31.6	30.7	31.25	33.6	32.5	1	1	4	3	2
CG085	2	49	24.1	32.7	34.2	33.55	29.3	33.15	31.6	27.9	31.65	29.65	32.95	35.95	34.25	27.6	30.3	28.6	30.05	32.3	31.25	1	1	4	3	5
CG086	2	54	22.4	33.25	35.2	34.75	31.15	34.3	32.75	30.15	33.95	31.65	29.6	33.6	31.15	29.25	31.4	29.9	31.2	33.7	32.5	1	1	4	4	3
CG087	2	51	26.5	32.25	35	33.95	29.65	33	31.6	28	32.7	29.55	31.8	34.75	33.25	28.3	30.45	29.45	31.45	33.55	32.55	1	4	3	3	2
CG088	2	64	22.8	30.55	33.75	33.05	29.55	32.8	30.8	28.4	32.35	29.6	29.75	33.8	31.85	27.6	30.4	29.15	31	33.05	32.05	4	1	4	3	2
CG089	2	53	20	32.45	34.25	33.7	30.65	33.95	32.7	28.45	33.8	30.8	29.35	33.7	31.6	28.05	30.95	28.8	29.85	32	30.95	1	1	4	3	2
CG090	2	50	22.8	30.95	33.6	33.1	32.1	34.7	33.5	29.5	33.65	31.55	31.3	33.9	32.8	28.95	31.05	29.65	30.85	33	32	1	1	4	3	3
CG091	2	53	19.9	31.5	32.5	32.1	32.05	34.85	33.75	30.5	35.15	32.15	30.55	35.25	32.6	29.65	32.15	30.65	31.7	33.65	32.9	1	1	4	4	2
CG092	2	45	20.7	31.6	34.45	34.05	30.95	34.65	32.95	30.95	34.4	32.05	31.9	34.6	33.2	29.7	32.5	30.6	30.6	32.05	31.5	1	1	3	4	3
